# Supplementary material for: Structural Features of the ATP-Binding Cassette (ABC) Transporter ABCA3
Source: PubMed Central journal article supplement (PMC4581316; doi:10.3390/ijms160819631), 2015-08-19
Supplement: ijms-16-19631-s001.pdf [file ijms-16-19631-s001.pdf]

# Supplementary Information

|                      | Helix 1                                          | Helix 2                                             |
|----------------------|--------------------------------------------------|-----------------------------------------------------|
| NCBI Protein         | MAVLRQLALLLWKNYTLQKRKVLVTVLELFLPLLFSGILIWLRLKIQS | PFADPFLVAIQYQLPLLLLLSFTYTALTIARAVVQEKERRLKEYMRMMGLS |
| SMART                | MAVLRQLALLLWKNYTLQKRKVLVTVLELFLPLLFSGILIWLRLKIQS | PFADPFLVAIQYQLPLLLLLSFTYTALTIARAVVQEKERRLKEYMRMMGLS |
| Bruder et al., 2007  | MAVLRQLALLLWKNYTLQKRKVLVTVLELFLPLLFSGILIWLRLKIQS | PFADPFLVAIQYQLPLLLLLSFTYTALTIARAVVQEKERRLKEYMRMMGLS |
| Park SK et al., 2010 | MAVLRQLALLLWKNYTLQKRKVLVTVLELFLPLLFSGILIWLRLKIQS | PFADPFLVAIQYQLPLLLLLSFTYTALTIARAVVQEKERRLKEYMRMMGLS |
| Jpred                | MAVLRQLALLLWKNYTLQKRKVLVTVLELFLPLLFSGILIWLRLKIQS | PFADPFLVAIQYQLPLLLLLSFTYTALTIARAVVQEKERRLKEYMRMMGLS |
| HMMTOP               | MAVLRQLALLLWKNYTLQKRKVLVTVLELFLPLLFSGILIWLRLKIQS | PFADPFLVAIQYQLPLLLLLSFTYTALTIARAVVQEKERRLKEYMRMMGLS |
| Porter               | MAVLRQLALLLWKNYTLQKRKVLVTVLELFLPLLFSGILIWLRLKIQS | PFADPFLVAIQYQLPLLLLLSFTYTALTIARAVVQEKERRLKEYMRMMGLS |
| TMpred               | MAVLRQLALLLWKNYTLQKRKVLVTVLELFLPLLFSGILIWLRLKIQS | PFADPFLVAIQYQLPLLLLLSFTYTALTIARAVVQEKERRLKEYMRMMGLS |

| Helix 3                                    | Helix 4                       | Helix 5                         |
|--------------------------------------------|-------------------------------|---------------------------------|
| YMRMMGLSSWLHWSAWFLFFLFLLLIAASFMTLLFCVKVKPN | SDPSLVLAFLLCFAISTISFSFMVSTFFS | KANMAAAFGGFLYFFTYIPYFFVAAPRYNWM |
| YMRMMGLSSWLHWSAWFLFFLFLLLIAASFMTLLFCVKVKPN | SDPSLVLAFLLCFAISTISFSFMVSTFFS | KANMAAAFGGFLYFFTYIPYFFVAAPRYNWM |
| YMRMMGLSSWLHWSAWFLFFLFLLLIAASFMTLLFCVKVKPN | SDPSLVLAFLLCFAISTISFSFMVSTFFS | KANMAAAFGGFLYFFTYIPYFFVAAPRYNWM |
| YMRMMGLSSWLHWSAWFLFFLFLLLIAASFMTLLFCVKVKPN | SDPSLVLAFLLCFAISTISFSFMVSTFFS | KANMAAAFGGFLYFFTYIPYFFVAAPRYNWM |
| YMRMMGLSSWLHWSAWFLFFLFLLLIAASFMTLLFCVKVKPN | SDPSLVLAFLLCFAISTISFSFMVSTFFS | KANMAAAFGGFLYFFTYIPYFFVAAPRYNWM |
| YMRMMGLSSWLHWSAWFLFFLFLLLIAASFMTLLFCVKVKPN | SDPSLVLAFLLCFAISTISFSFMVSTFFS | KANMAAAFGGFLYFFTYIPYFFVAAPRYNWM |
| YMRMMGLSSWLHWSAWFLFFLFLLLIAASFMTLLFCVKVKPN | SDPSLVLAFLLCFAISTISFSFMVSTFFS | KANMAAAFGGFLYFFTYIPYFFVAAPRYNWM |
| YMRMMGLSSWLHWSAWFLFFLFLLLIAASFMTLLFCVKVKPN | SDPSLVLAFLLCFAISTISFSFMVSTFFS | KANMAAAFGGFLYFFTYIPYFFVAAPRYNWM |

| Helix 5b                       | Helix 6                            |
|--------------------------------|------------------------------------|
| LSQKLCSCLLSNVAMAMGAQLIGKFEAKGM | DDDFCFGQVLGMLLLDSVLYGLVTWYMEAVFPGQ |
|                                | DDDFCFGQVLGMLLLDSVLYGLVTWYMEAVFPGQ |
|                                | DDDFCFGQVLGMLLLDSVLYGLVTWYMEAVFPGQ |
| LSQKLCSCLLSNVAMAMGAQLIGKFEAKGM | DDDFCFGQVLGMLLLDSVLYGLVTWYMEAVFPGQ |
| LSQKLCSCLLSNVAMAMGAQLIGKFEAKGM | DDDFCFGQVLGMLLLDSVLYGLVTWYMEAVFPGQ |
| LSQKLCSCLLSNVAMAMGAQLIGKFEAKGM | DDDFCFGQVLGMLLLDSVLYGLVTWYMEAVFPGQ |
| LSQKLCSCLLSNVAMAMGAQLIGKFEAKGM | DDDFCFGQVLGMLLLDSVLYGLVTWYMEAVFPGQ |

Figure S1. Cont.

|                                  |                                           |                                                 |                                   |                                       |
|----------------------------------|-------------------------------------------|-------------------------------------------------|-----------------------------------|---------------------------------------|
| <b>Helix 7</b>                   |                                           | <b>Helix 8</b>                                  |                                   |                                       |
| GLALHCQQFWAMFLKKAAYSREWKM        | <b>MVAQVLVPLTCVTLALLAINYSSE</b>           | GFDIALNLLFAMAFLASTFSILAVSERAVQAKHVQFVSGV        |                                   |                                       |
| GLALHCQQFWAMFLKKAAYSREWKM        | <b>MVAQVLVPLTCVTLALLAINYSSE</b>           | <b>GFDIALNLLFAMAFLASTFSILAVSERAVQAKHVQFVSGV</b> |                                   |                                       |
| GLALHCQQFWAMFLKKAAYSREWKM        | <b>MVAQVLVPLTCVTLALLAINYSSE</b>           | GFDIALNLLFAMAFLASTFSILAVSERAVQAKHVQFVSGV        |                                   |                                       |
| GLALHCQQFWAMFLKKAAYSREWKM        | <b>VAAQVLVPLTCVTLALLAINYSSE</b>           | <b>GFDIALNLLFAMAFLASTFSILAVSERAVQAKHVQFVSGV</b> |                                   |                                       |
| GLALHCQQFWAMFLKKAAYSREWKM        | <b>VAAQVLVPLTCVTLALLAINYSSE</b>           | GFDIALNLLFAMAFLASTFSILAVSERAVQAKHVQFVSGV        |                                   |                                       |
| <b>GLALHCQQFWAMFLKKAAYSREWKM</b> | <b>VAAQVLVPLTCVTLALLAINYSSE</b>           | <b>GFDIALNLLFAMAFLASTFSILAVSERAVQAKHVQFVSGV</b> |                                   |                                       |
| GLALHCQQFWAMFLKKAAYSREWKM        | <b>VAAQVLVPLTCVTLALLAINYSSE</b>           | GFDIALNLLFAMAFLASTFSILAVSERAVQAKHVQFVSGV        |                                   |                                       |
| <b>Helix 9</b>                   |                                           | <b>Helix 10</b>                                 | <b>Helix 11</b>                   |                                       |
| HVASFWLS                         | <b>SALLWDLISFLIPSLLLL</b> VVFKAFDVRAFTRDG | HMADTLLLLLLYGWAI                                | IPLMYLMNFFFLGAA                   | TAYTRLTIFNILSGIATFLMVTIMRIPAVK        |
| HVASFWLS                         | <b>SALLWDLISFLIPSLLLL</b> VVFKAFDVRAFTRDG | HMADTLLLLLLYGWAI                                | IPLMYLMNFFFLGAA                   | TAYTRLTIFNILSGIATFLMVTIMRIPAVK        |
| HVASFWLS                         | <b>SALLWDLISFLIPSLLLL</b> VVFKAFDVRAFTRDG | HMADTLLLLLLYGWAI                                | IPLMYLMNFFFLGAA                   | TAYTRLTIFNILSGIATFLMVTIMRIPAVK        |
| HVASFWLS                         | <b>SALLWDLISFLIPSLLLL</b> VVFKAFDVRAFTRDG | HMADTLLLLLLYGWAI                                | IPLMYLMNFFFLGAA                   | TAYTRLTIFNILSGIATFLMVTIMRIPAVK        |
| HVASFWLS                         | <b>SALLWDLISFLIPSLLLL</b> VVFKAFDVRAFTRDG | HMADTLLLLLLYGWAI                                | IPLMYLMNFFFLGAA                   | TAYTRLTIFNILSGIATFLMVTIMRIPAVK        |
| HVASFWLS                         | <b>SALLWDLISFLIPSLLLL</b> VVFKAFDVRAFTRDG | HMADTLLLLLLYGWAI                                | IPLMYLMNFFFLGAA                   | TAYTRLTIFNILSGIATFLMVTIMRIPAVK        |
| HVASFWLS                         | <b>SALLWDLISFLIPSLLLL</b> VVFKAFDVRAFTRDG | <b>HMADTLLLLLLYGWAI</b>                         | IPLMYLMNFFFLGAA                   | <b>TAYTRLTIFNILSGIATFLMVTIMRIPAVK</b> |
| HVASFWLS                         | <b>SALLWDLISFLIPSLLLL</b> VVFKAFDVRAFTRDG | HMADTLLLLLLYGWAI                                | IPLMYLMNFFFLGAA                   | TAYTRLTIFNILSGIATFLMVTIMRIPAVK        |
| <b>Helix 11b</b>                 |                                           | <b>Helix 12</b>                                 |                                   |                                       |
| LEELSKTLDHV                      | <b>FLVLPNHCLGMAVSS</b> FYENYETRRYCT       | SAPGVGR                                         | <b>FVASMAASGCAYLILLFLI</b> ETNLLQ |                                       |
| LEELSKTLDHV                      | <b>FLVLPNHCLGMAVSS</b> FYENYETRRYCT       | SAPGVGR                                         | <b>FVASMAASGCAYLILLFLI</b> ETNLLQ |                                       |
| LEELSKTLDHV                      | <b>FLVLPNHCLGMAVSS</b> FYENYETRRYCT       | SAPGVGR                                         | <b>FVASMAASGCAYLILLFLI</b> ETNLLQ |                                       |
| LEELSKTLDHV                      | <b>FLVLPNHCLGMAVSS</b> FYENYETRRYCT       | SAPGVGR                                         | <b>FVASMAASGCAYLILLFLI</b> ETNLLQ |                                       |
| LEELSKTLDHV                      | <b>FLVLPNHCLGMAVSS</b> FYENYETRRYCT       | SAPGVGR                                         | <b>FVASMAASGCAYLILLFLI</b> ETNLLQ |                                       |
| LEELSKTLDHV                      | <b>FLVLPNHCLGMAVSS</b> FYENYETRRYCT       | SAPGVGR                                         | <b>FVASMAASGCAYLILLFLI</b> ETNLLQ |                                       |
| LEELSKTLDHV                      | <b>FLVLPNHCLGMAVSS</b> FYENYETRRYCT       | SAPGVGR                                         | <b>FVASMAASGCAYLILLFLI</b> ETNLLQ |                                       |

**Figure S1.** Prediction of TMD1 and TMD2 helix domains (in red) from sequences reported by different authors/software. For Bruder E. *et al.* 2007 see reference [36], for Park S.K. *et al.* 2010 see reference [37].

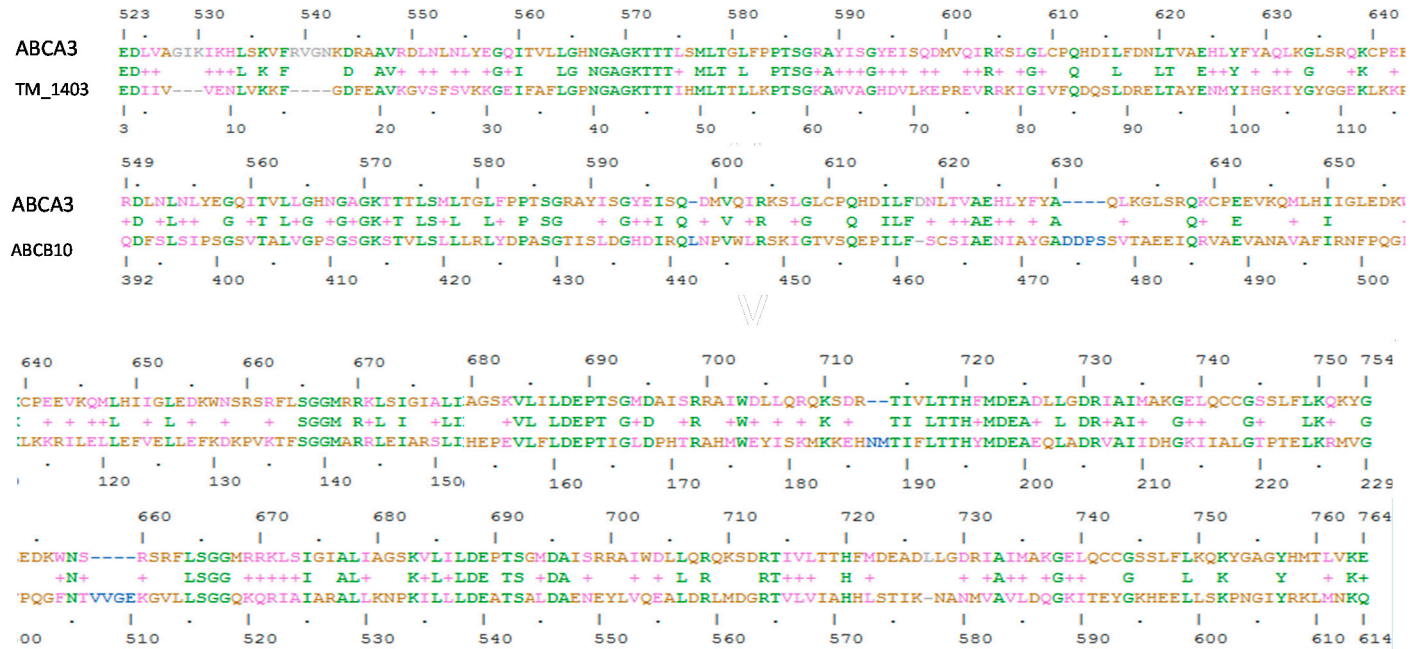

(A)

Figure S2. Cont.

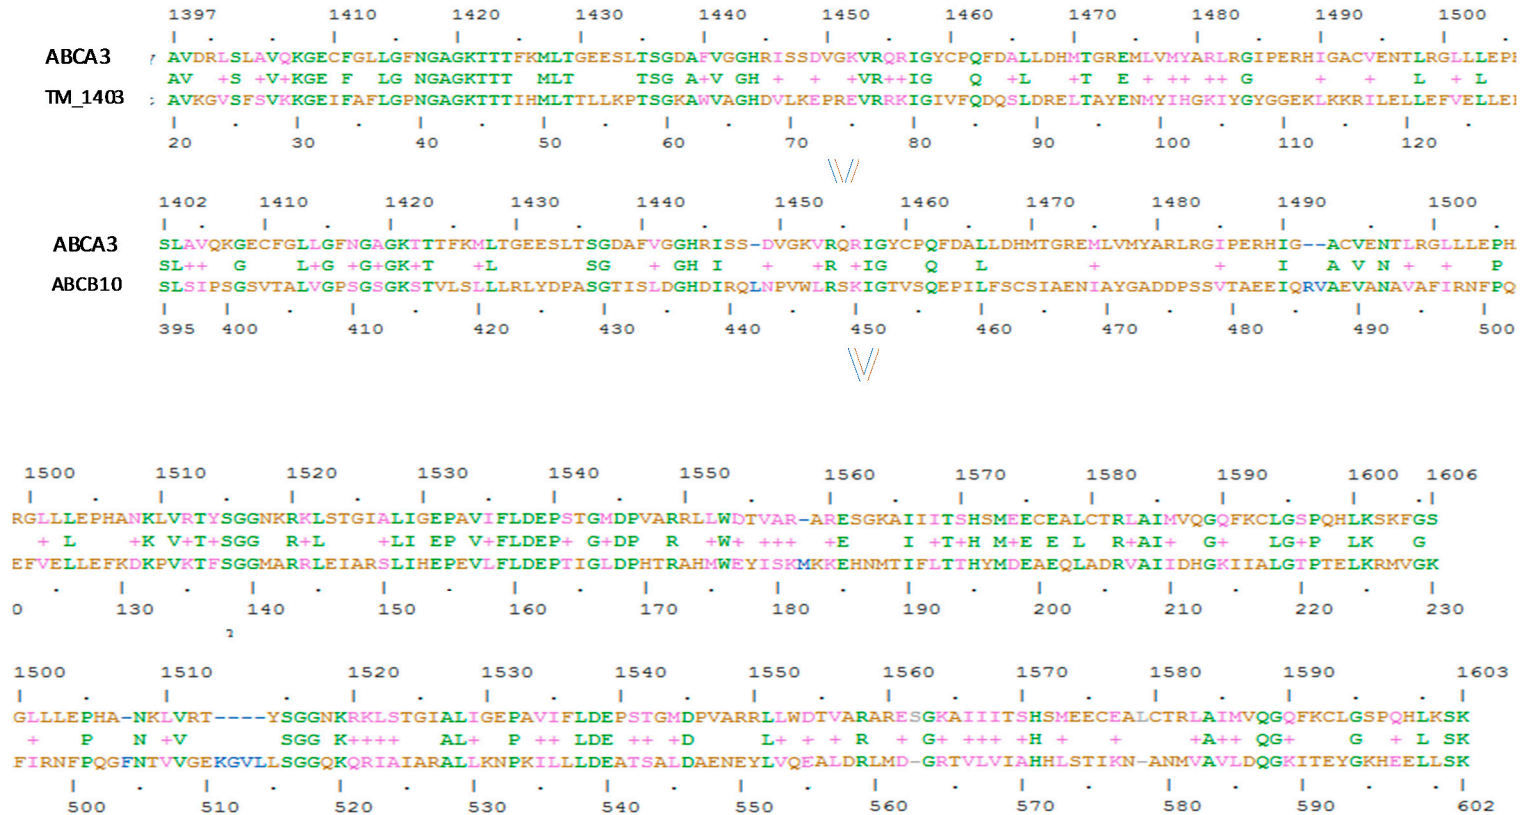

(B)

**Figure S2.** From the secondary structure comparative analyses on the ABCA3 protein we found that NBD1 (A) and NBD2 (B) respectively have 35% and 38% similarity with the correspondent NBDs of *Thermotoga maritima* (TM\_1403), and a similarity of 28% and 23% respectively with NBDs of human ABCB10. In the alignment, amino acids are represented in green (when amino acids are the same), pink (when the amino acid lateral groups are similar), orange (when amino acids are different), blue (when a deletion occurred) and grey (when an insertion occurred).
